# Supplementary material
Source: PubMed Central journal article supplement (PMC10032574)
Supplement: mmc1.pdf [file mmc1.pdf]

**Cell Reports, Volume 37**

**Supplemental information**

**Proteomics reveal cap-dependent  
translation inhibitors remodel the  
translation machinery and translato**

**J.J. David Ho, Tyler A. Cunningham, Paola Manara, Caroline A. Coughlin, Artavazd Arumov, Evan R. Roberts, Ashanti Osteen, Preet Kumar, Daniel Bilbao, Jonathan R. Krieger, Stephen Lee, and Jonathan H. Schatz**

## Supplemental information

### **Proteomics Reveal Cap-dependent Translation Inhibitors Remodel the Translation Machinery and Translatome**

J.J. David Ho<sup>1,2,3,\*,#</sup>, Tyler A. Cunningham<sup>1,4,5,\*</sup>, Paola Manara<sup>1,6</sup>, Caroline A. Coughlin<sup>1,4,6</sup>, Artavazd Arumov<sup>1,6</sup>, Evan R. Roberts<sup>1,7</sup>, Ashanti Osteen<sup>1,7</sup>, Preet Kumar<sup>1,2</sup>, Daniel Bilbao<sup>1,7</sup>, Jonathan R. Krieger<sup>8</sup>, Stephen Lee<sup>1,9</sup>, & Jonathan H. Schatz<sup>1,2,#,†</sup>

## **Inventory of Supplemental Information**

**1.**

### **Supplemental Figures**

**Figure S1, related to Figure 1.**

**Figure S2, related to Figure 1.**

**Figure S3, related to Figure 2.**

**Figure S4, related to Figure 3.**

**Figure S5, related to Figure 4.**

**Figure S6, related to Figure 4.**

**Figure S7, related to Figure 5.**

**Figure S8, related to Figure 6.**

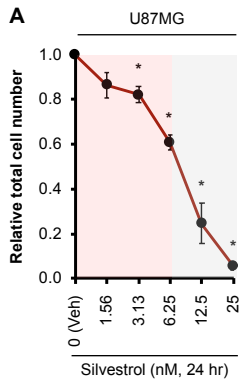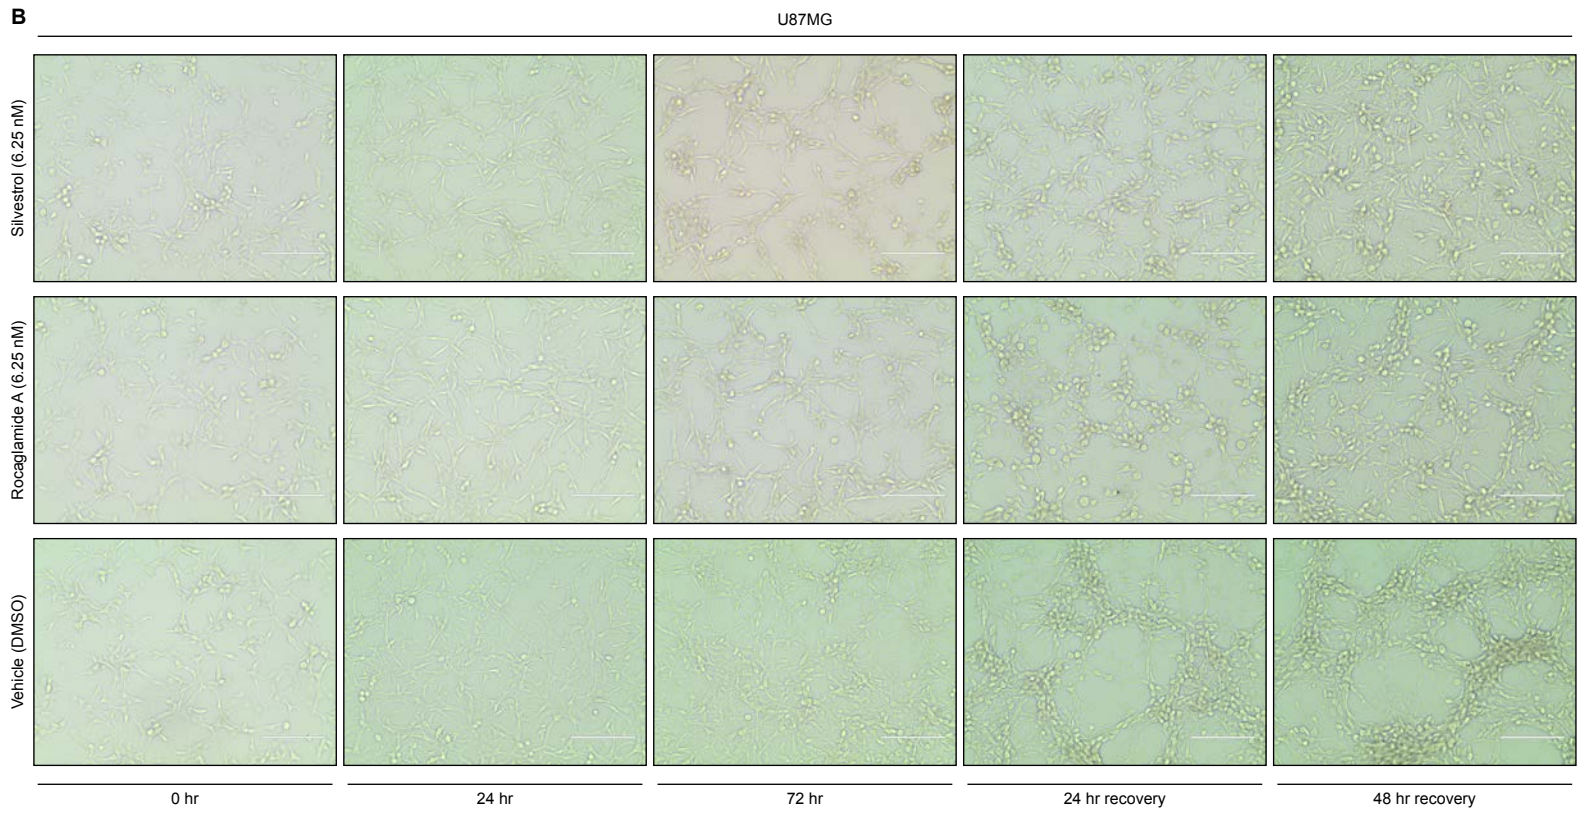

**Figure S1.**

**Figure S1. TMT-pSILAC reveals rocaglate-dependent translome remodeling, related to Figure 1.** (A) Relative cell number of U87MG treated with silvestrol (indicated concentrations) or vehicle (DMSO) for 24 hr. Data represent mean  $\pm$  SEM (error bars) of three independent experiments. Asterisk denotes statistical significance calculated using two-sided Student's t-tests compared to vehicle (DMSO). Pink-shaded area highlights concentrations at which cell viability was largely maintained ( $> 80\%$ ). (B) Representative bright field images of U87MG treated with silvestrol (6.25 nM), rocaglamide A (6.25 nM), or DMSO, for 72 hr followed by 48 hr of treatment recovery. Scale bars represent 200  $\mu\text{m}$ .

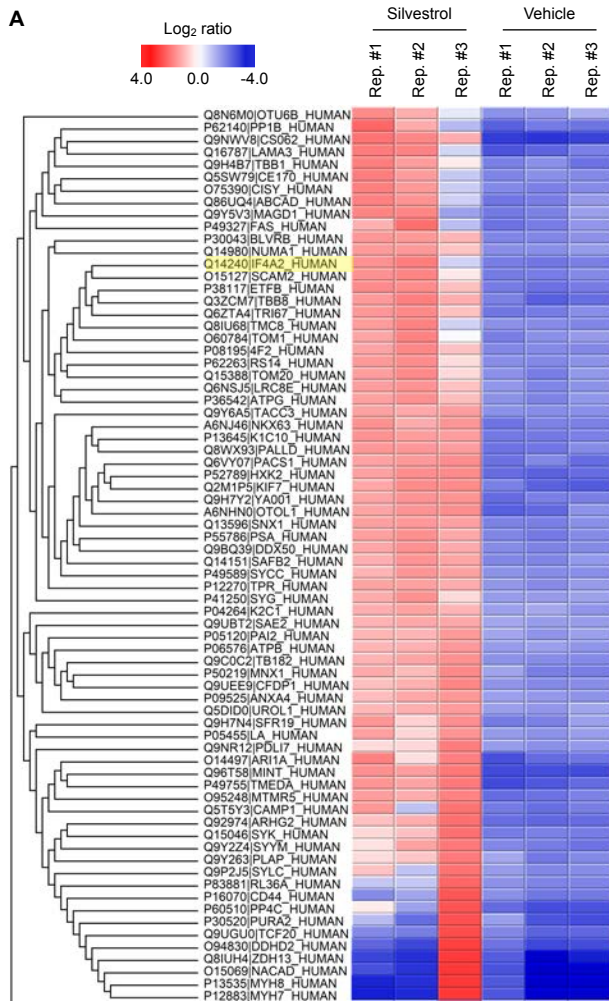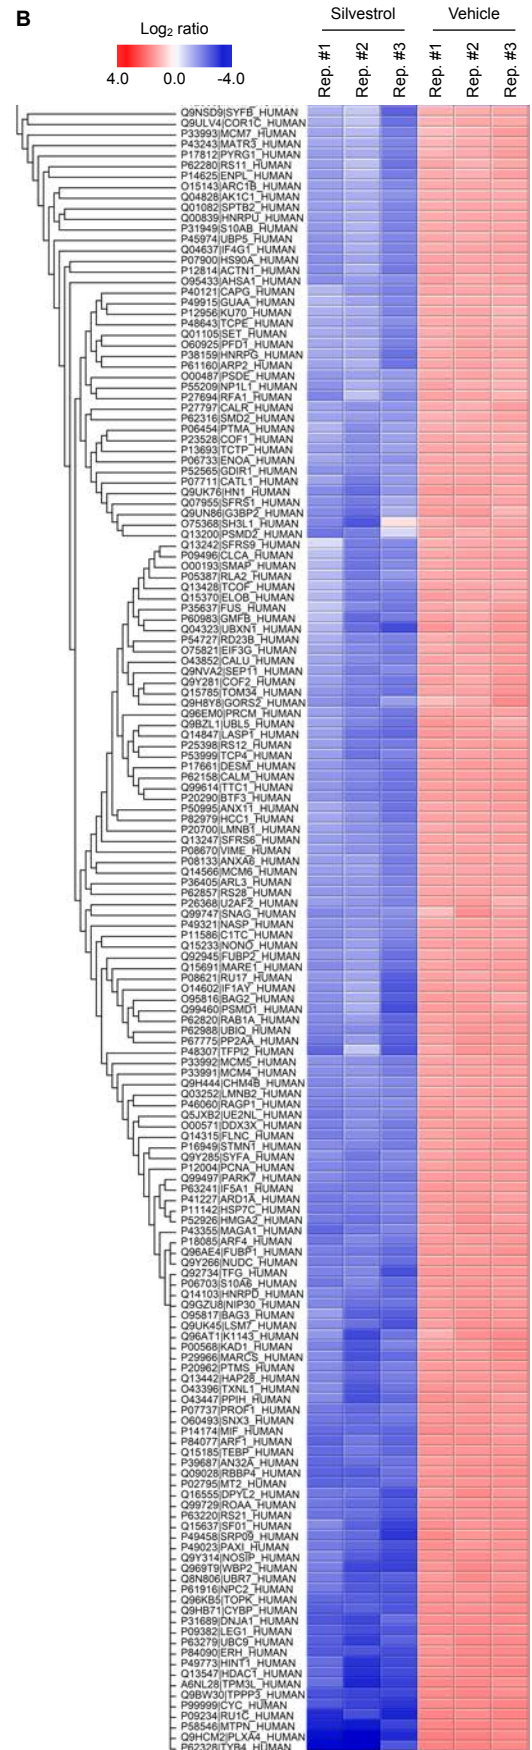

**C PANTHER Overrepresentation Test**

| Gene Ontology term                          | Fold enrichment                      | P value  | FDR corrected p |
|---------------------------------------------|--------------------------------------|----------|-----------------|
| Polymeric cytoskeletal fiber (GO:0099513)   | 4.07x                                | 4.51e-06 | 3.02e-03        |
|                                             | e.g. <b>GEF-H1</b>                   |          |                 |
| Extracellular space (GO:0005615)            | 2.01x                                | 8.86e-05 | 1.27e-02        |
|                                             | e.g. <b>CD98hc</b>                   |          |                 |
| Aminoacyl-tRNA ligase activity (GO:0004812) | 16.2x                                | 6.66e-05 | 3.90e-02        |
|                                             | <b>CARS, GARS, KARS, LARS, YARS2</b> |          |                 |

Figure S2.

**Figure S2. TMT-pSILAC reveals rocaglate-dependent translome remodeling, related to Figure 1.** (A) Unsupervised hierarchical clustering of silvestrol-inducible proteins based on TMT-pSILAC analysis. Cell color represents the  $\log_2$  ratio to the average abundance across different samples. The following filters were applied: target detected across all 6 samples, fold change  $\geq 2$ , spectrum quality  $\geq 10$ . eIF4A2 (IF4A2) was confirmed as a positive control (highlighted). 72 proteins identified. (B) Unsupervised hierarchical clustering of silvestrol-repressed proteins based on TMT-pSILAC. PTGES3 (TEBP) was confirmed as a positive control (highlighted). 165 proteins identified. (C) Gene Ontology (GO) pathway enrichment analysis performed on the 101 silvestrol-induced proteins using the PANTHER classification algorithm. P values were calculated using the Fisher's Exact test, and corrected for multiple comparisons using the False Discovery Rate (FDR) method.

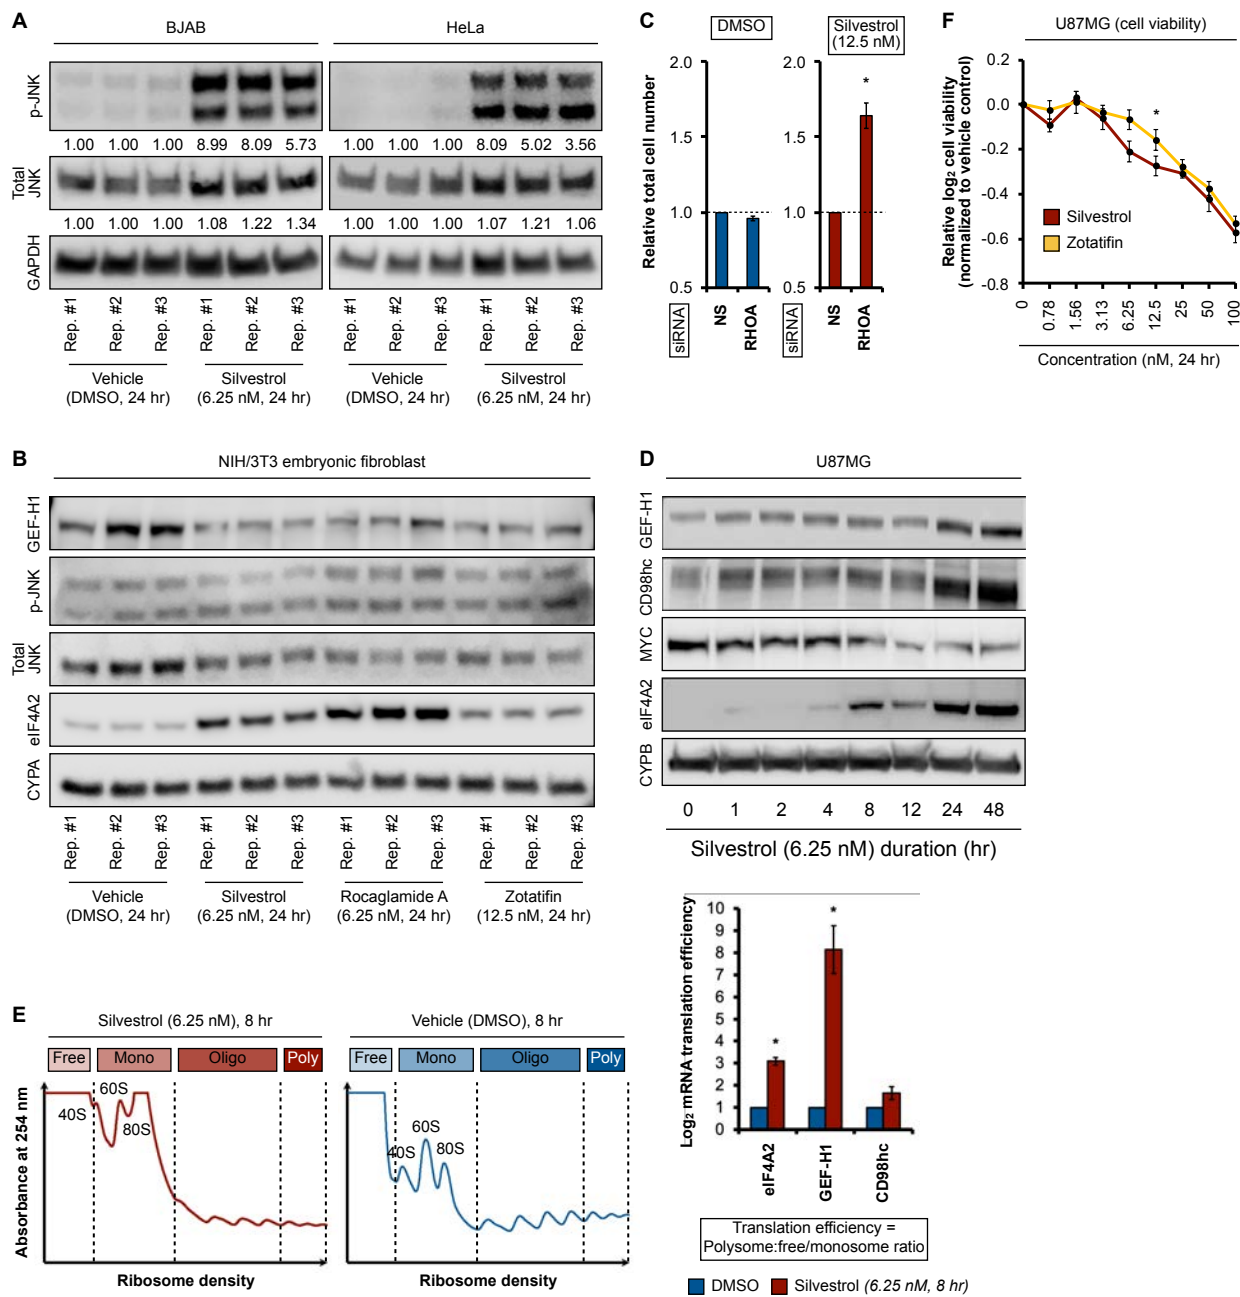

Figure S3.



**Figure S3. Rocaglate-inducible GEF-H1 regulates JNK signaling via RHOA in malignant cells, related to Figure 2.** (A) Representative immunoblots of BJAB and HeLa treated with silvestrol (6.25 nM) or vehicle (DMSO) for 24 hr. Densitometry values are normalized to loading control. (B) Representative immunoblots of NIH/3T3 mouse embryonic fibroblasts treated with silvestrol (6.25 nM), rocaglamide A (6.25 nM), zotatifin (12.5 nM) or vehicle (DMSO) for 24 hr. (C) Relative total cell number of U87MG treated with indicated siRNA pools (100 nM final concentration) for 72 hr, followed by treatment with silvestrol (12.5 nM) or vehicle (DMSO) for 24 hr. Data represent mean  $\pm$  SEM (error bars) of three independent experiments. \* indicates  $p < 0.05$  compared to NS (non-silencing) siRNA control. (D) Representative immunoblots of U87MG treated with silvestrol (indicated concentrations) for indicated durations. (E) Ribosome density profiles (left panel) and mRNA translation efficiency (abundance ratio of polysome-associated mRNA to ribosome-free and monosome-associated mRNA) (right panel) of U87MG treated with silvestrol (6.25 nM) or vehicle (DMSO) for 8 hr. Data represent mean  $\pm$  SEM (error bars) of five independent experiments. \* denotes  $p < 0.05$  compared to vehicle (DMSO) treatment. of U87MG treated with silvestrol (6.25 nM) or vehicle (DMSO) for 8 hr. (F) Relative cell viability based on ATP levels in U87MG treated with indicated concentrations of silvestrol or zotatifin for 24 hr (left panel) or 48 hr (right panel). Data represent mean  $\pm$  SEM (error bars) of four independent cell populations. \* and \*\* indicate  $p < 0.05$  and  $p < 0.01$ , respectively compared to vehicle-treated condition.

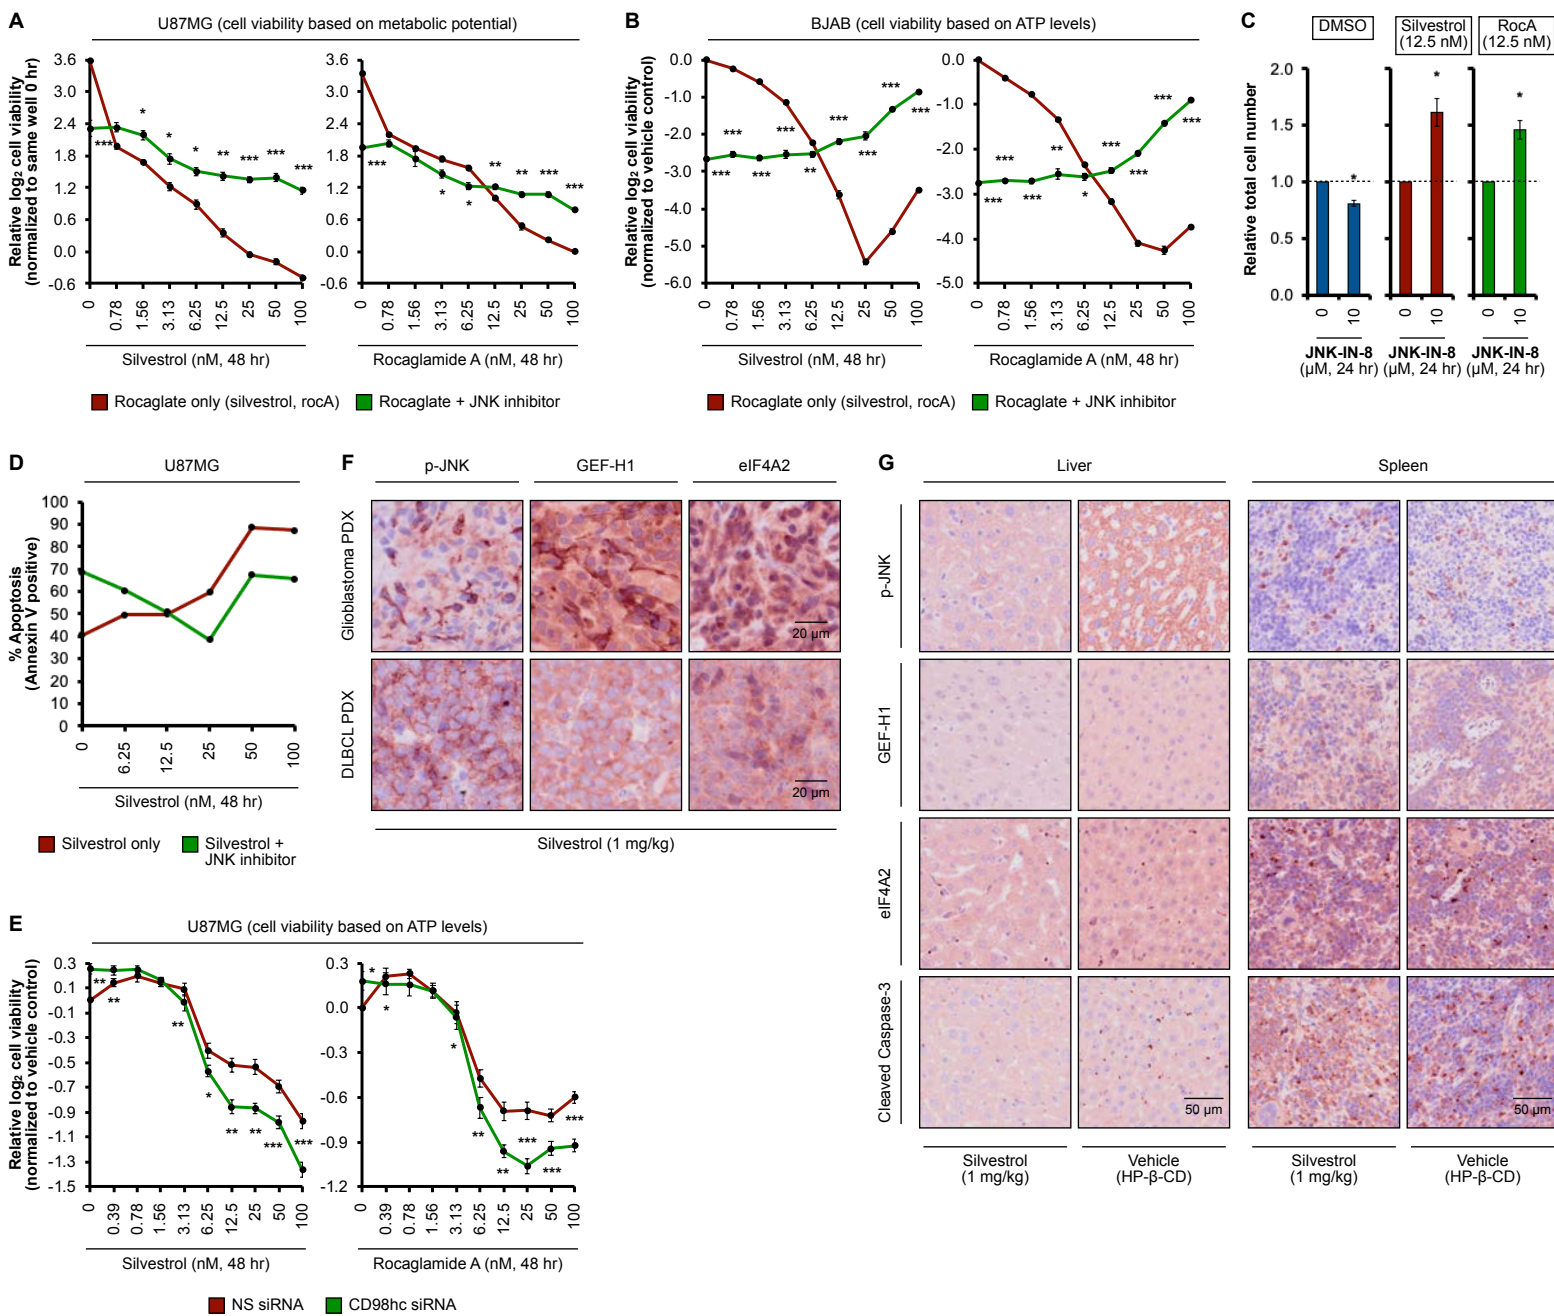

Figure S4.

**Figure S4. Rocaglate-inducible JNK phosphorylation mediates cellular toxicity signaling, related to Figure 3.** (A) Relative cell viability based on cellular metabolic potential in U87MG treated with indicated concentrations of silvestrol (left panel) or rocaglamide A (right panel) with and without JNK inhibitor JNK-IN-8 (10  $\mu$ M) for 48 hr. Data represent mean  $\pm$  SEM (error bars) of four independent cell populations. \*, \*\*, and \*\*\* indicate  $p < 0.05$ ,  $p < 0.01$ , and  $p < 0.001$ , respectively, compared to corresponding rocaglate only condition. (B) Relative cell viability based on ATP levels in BJAB treated with indicated concentrations of silvestrol and rocaglamide A, with and without JNK inhibitor JNK-IN-8 (10  $\mu$ M) for 48 hr. Data represent mean  $\pm$  SEM (error bars) of four independent cell populations. \*, \*\*, and \*\*\* indicate  $p < 0.05$ ,  $p < 0.01$ , and  $p < 0.001$ , respectively, compared to corresponding rocaglate only condition. (C) Relative total cell number of U87MG treated with silvestrol (12.5 nM), rocaglamide A (rocA, 12.5 nM), or vehicle (DMSO), with and without JNK inhibitor JNK-IN-8 (10  $\mu$ M) for 24 hr. Data represent mean  $\pm$  SEM (error bars) of three independent experiments. \* denotes statistical significance compared to vehicle (DMSO). (D) Percent apoptosis in U87MG treated with indicated concentrations of silvestrol or vehicle (DMSO) with and without JNK inhibitor JNK-IN-8 (10  $\mu$ M) for 48 hr. Representative experiment shown. Three independent experiments were performed. (E) Relative cell viability of U87MG treated with indicated siRNA pools (50 nM final concentration) for 48 hr, followed by indicated concentrations of silvestrol (left panel) or rocaglamide A (right panel) for 48 hr. Data represent mean  $\pm$  SEM (error bars) of four independent cell populations. \*, \*\*, and \*\*\* indicate  $p < 0.05$ ,  $p < 0.01$ , and  $p < 0.001$ , respectively, compared to corresponding NS siRNA control. Representative immunohistochemistry images of (F) glioblastoma and DLBCL PDX tumors (scale bar represents 20  $\mu$ m), (G) liver (left panel) and spleen (right panel) of mice treated with silvestrol (1 mg/kg) or vehicle (2-hydroxypropyl- $\beta$ -cyclodextrin) (daily intraperitoneal injection for three days) (scale bar represents 50  $\mu$ m).

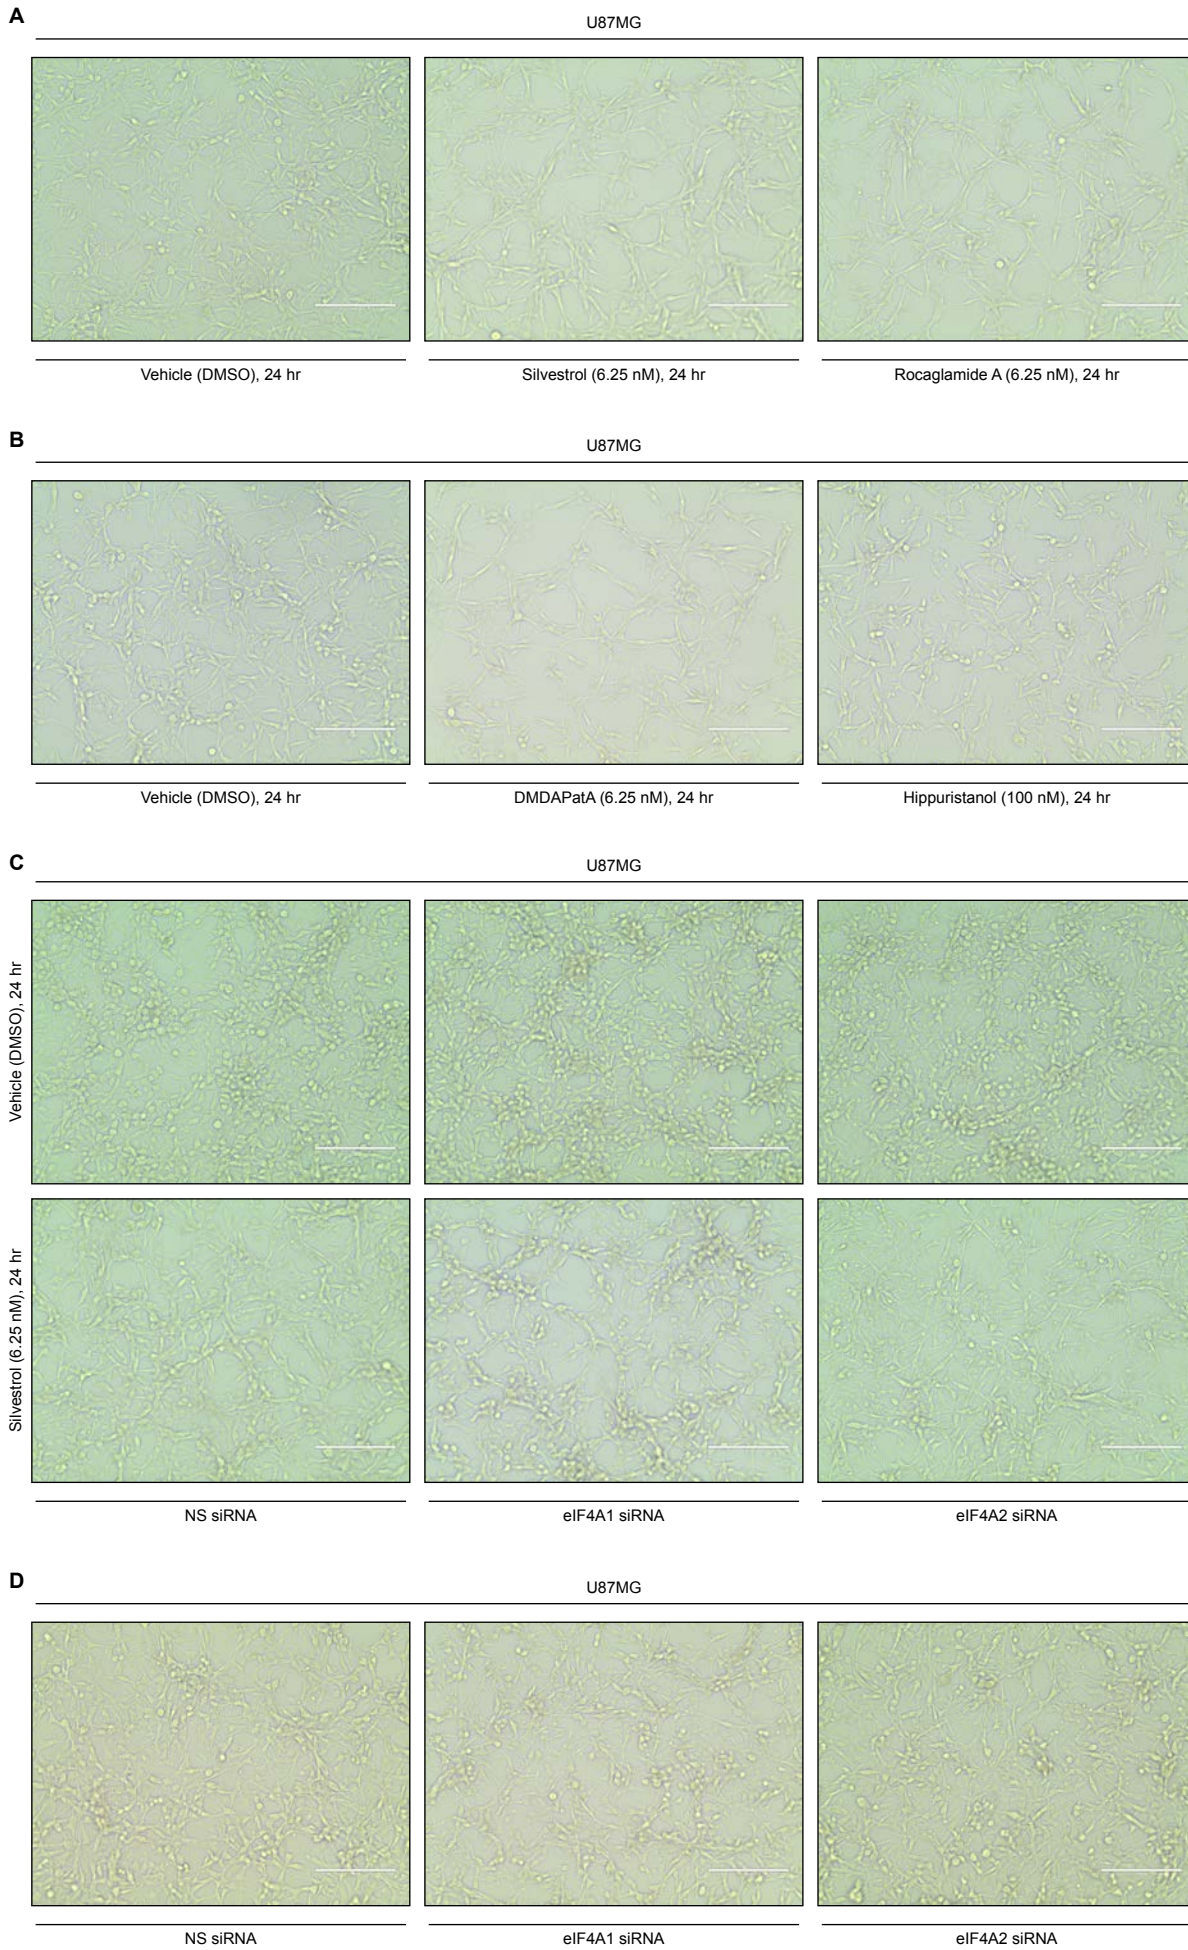

**Figure S5.**

**Figure S5. Mechanisms of rocaglate-dependent protein induction, related to Figure 4. (A)** Representative bright field images of U87MG treated with silvestrol (6.25 nM), rocaglamide A (6.25 nM), or vehicle (DMSO) for 24 hr. **(B)** Representative bright field images of U87MG treated with DMDAPatA (6.25 nM), hippuristanol (100 nM), or vehicle (DMSO) for 24 hr. Scale bars in (a) to (d) represent 200  $\mu$ m. **(C)** Representative bright field images of U87MG treated with indicated siRNA pools (50 nM final concentration) for 48 hr, followed by silvestrol treatment (6.25 nM) or vehicle (DMSO) for 24 hr. **(D)** Representative bright field images of U87MG treated with indicated siRNA pools (50 nM final concentration) for 48 hr. NS: non-silencing.

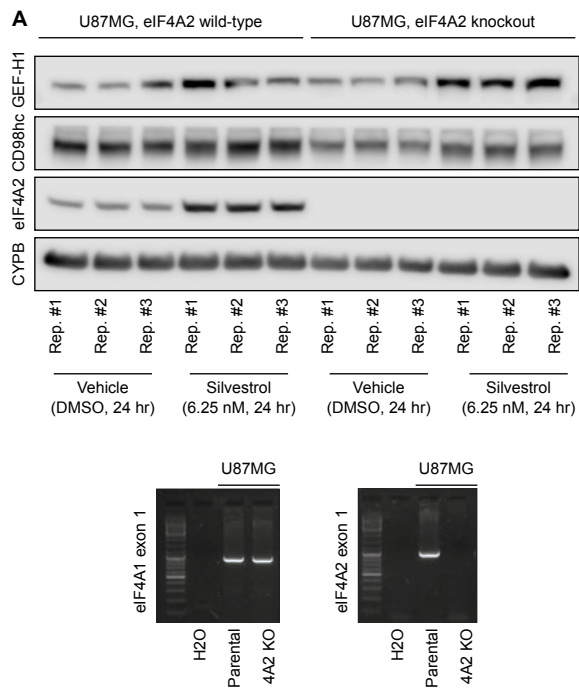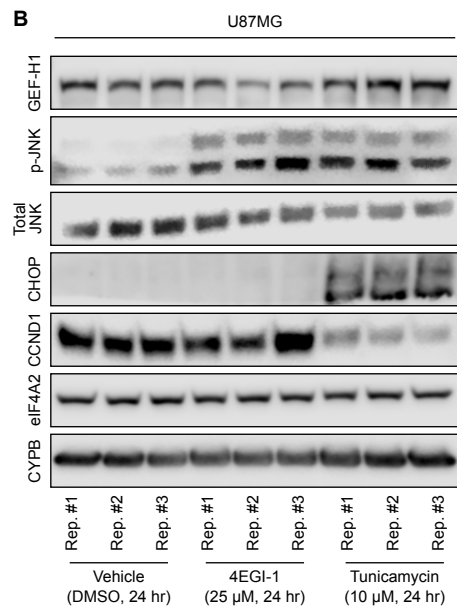

Figure S6.

**Figure S6. Mechanisms of rocaglate-dependent protein induction, related to Figure 4**

(A) Representative immunoblots of U87MG eIF4A2 wild-type or eIF4A2 knockout cells treated with silvestrol (6.25 nM) or vehicle (DMSO) for 24 hr (top panel). Genomic DNA PCR analysis of exon 1 of eIF4A1 and eIF4A2 in U87MG parental and 4A2 KO cells (bottom panel). (B) Representative immunoblots of U87MG treated with 4EGI-1 (25  $\mu$ M), tunicamycin (10  $\mu$ M) or vehicle (DMSO) for 24 hr.

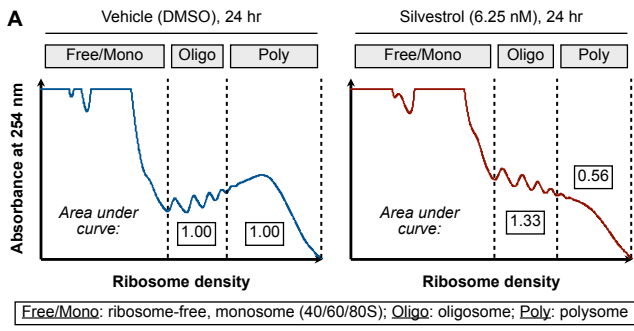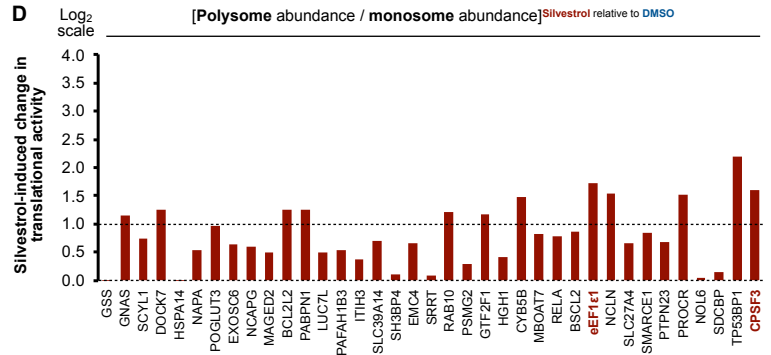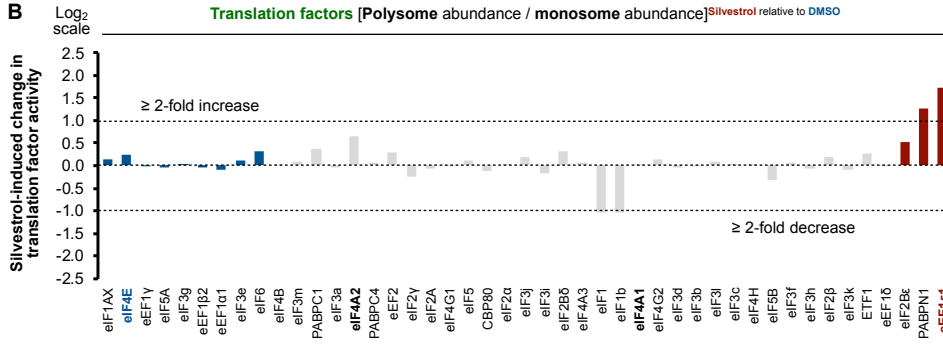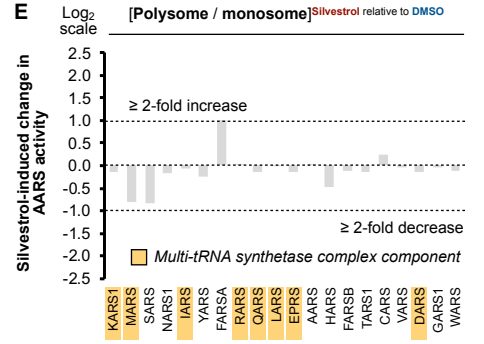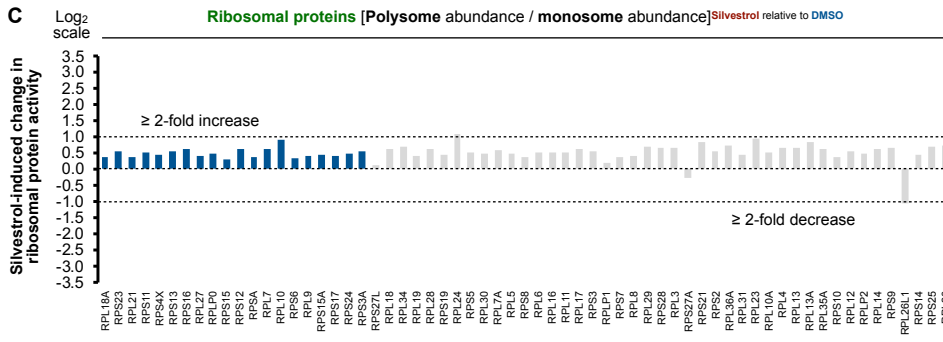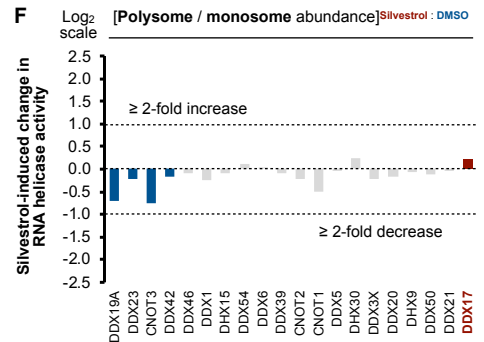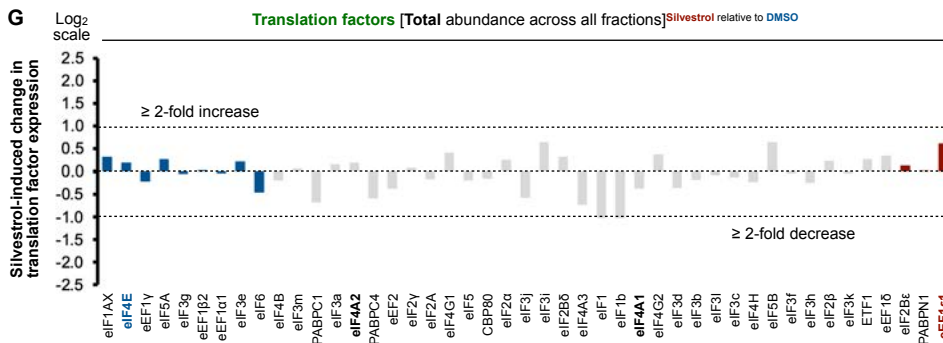

Figure S7.



**Figure S7. System-wide survey of rocaglate-dependent changes in the translation machinery, related to Figure 5.** (A) Ribosome density profiles of U87MG treated with vehicle (DMSO) or silvestrol (6.25 nM) for 24 hr. Samples were loaded based on equal total RNA content. 2x more total RNA was loaded compared to Figure 4A. MATRIX analysis of silvestrol-induced changes in translational activity (i.e. ratio of protein abundance in polysome versus monosome (40/60/80S) fraction) for (B) canonical translation factors, (C) ribosomal proteins, (D) most highly induced proteins ( $\geq 3x$  activity enrichment), (E) aminoacyl-tRNA synthetases (AARSs), and (F) DEAD/DEAH RNA helicases. (G) Total sum of protein abundances across all MATRIX fractions in silvestrol- versus vehicle-treated samples. Proteins (x-axis) are arranged in the same order as panels B-F of Figure 5. Blue and red indicate silvestrol-repressed and silvestrol-activated translational assets ( $\geq 2x$  difference in activity), respectively, based on [polysome/free] protein abundance ratios as shown in Figure 5.

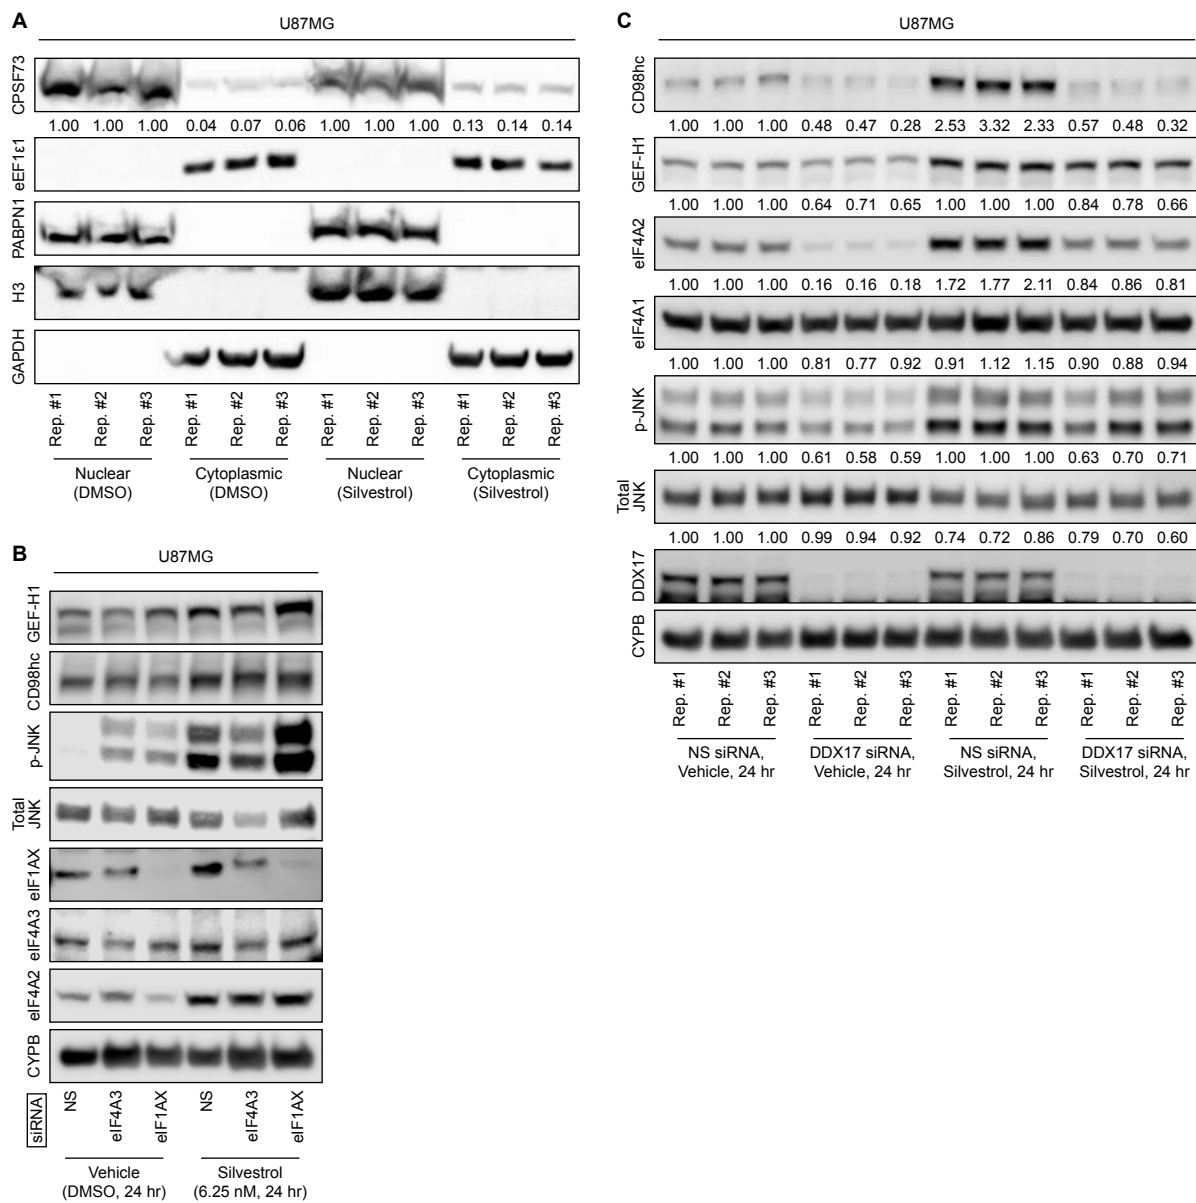

Figure S8.

**Figure S8. Increased eEF1ε1 activity enables rocaglate-driven protein synthesis, related to Figure 6.** (A) Representative immunoblots of nuclear and cytoplasmic fractions from U87MG treated with silvestrol (6.25 nM) or vehicle (DMSO) for 24 hr. Histone H3 and GAPDH are shown as nuclear and cytoplasmic controls, respectively. (B) Representative immunoblots of U87MG treated with silvestrol (6.25 nM) or vehicle (DMSO) for 24 hr. (C) Representative immunoblots of U87MG treated with indicated siRNA pools for 48 hr, followed by treatment with silvestrol (6.25 nM) or vehicle (DMSO) for 24 hr. Densitometry values in are normalized to loading control.
